# Supplementary material for: Prevalence of anaemia and associated risk factors among pregnant women attending antenatal care in Gulu and Hoima Regional Hospitals in Uganda: A cross sectional study
Source: Springer Nature journal article supplement (doi:10.1186/s12884-016-0865-4), 2016-04-11

**Appendix 1: Questionnaire (English version)**

We are conducting a study to determine the burden and reasons for anaemia among pregnant women attending antenatal care at Gulu and Hoima Regional Hospitals. The information obtained from this study will help health workers and the relevant authorities to find ways of reducing the problem of anaemia among pregnant women. We will therefore appreciate if you could answer the following questions very sincerely.

Thank you for accepting to take part in this study.

**Date of interview:** .....

**Hospital name:** .....

**Participant's identification number:** .....

**A: Socio-demographic characteristics**

1. How old are you? (age in completed years)
  - i) 15 – 19 years
  - ii) 20 – 24 years
  - iii) 25 – 29 years
  - iv) 30 – 34 years
  - v) 35 – 39 years
  - vi) > 39 years
2. What is your marital status?
  - i. Single
  - ii. Married
  - iii. Widowed
  - iv. Separated/divorced
3. Are you still attending school?
  - i. Yes
  - ii. No

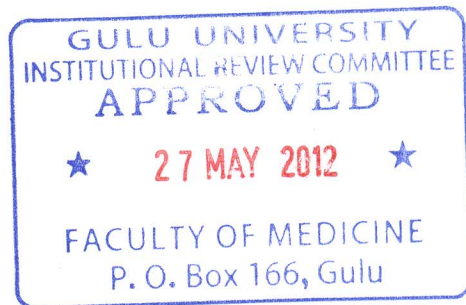

4. What is the highest level of formal education you have attained?

- i) No formal education
- ii) Primary
- iii) Secondary
- iv) Tertiary

5. What is your occupation?

- i. Housewife
- ii. Farming
- iii. Trade
- iv. Handicraft
- v. Formal employment

**B: Information on gravidity/parity**

6. How old is this pregnancy?

- i) 1 – 12 weeks (first trimester)
- ii) 13 – 27 weeks (second trimester)
- iii) 28 - 40 weeks (trimester)

7. How many times have you been pregnant/gravid including this current pregnancy?

- i) 1 -4
- ii)  $\geq 5$

8. When did you last give birth?

- i) Never given birth
- ii) 1-11 months ago
- iii) 12 -24 months ago
- iv) 25 – 36 months ago
- v) >36 months ago

9. Is your home located in a rural or urban area? (*ask for village and parish name*)

- i) Urban
- ii) Rural

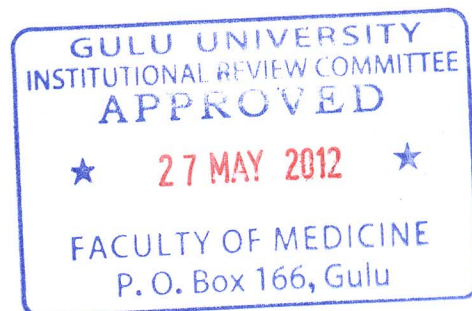

10. How many people live in your household?

- i) 1 -5 people
- ii) 6 – 10 people
- iii) >10 people

**C: Housing, sanitation, and family income**

11. What type of building do you live in?

- i. Mud and wattle
- ii. Semi permanent building
- iii. Permanent building

12. Who owns the building you live in?

- i) Rented
- ii) Owned by self

13. Does your household own a latrine/toilet?

- i) Yes
- ii) No

14. What is the total average monthly income (UGX) of your household?

- i. <75,000
- ii. 75,000 – <150,000
- iii. 150,000 -300,000
- iv. >300,000

Name of interviewer: .....

Signature: .....

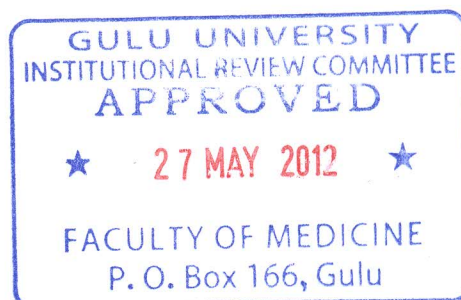

Participant's ID number (as above): .....

Date: .....

| parameter            | level | units                      |
|----------------------|-------|----------------------------|
| Hb                   |       | g/dL                       |
| haematocrit          |       | %                          |
| Red blood cell count |       | X10 <sup>6</sup> / $\mu$ L |
| MCV                  |       | fL                         |
| MCH                  |       | pg                         |
| MCHC                 |       | g/dL                       |

Name of person entering data: .....

Signature: .....

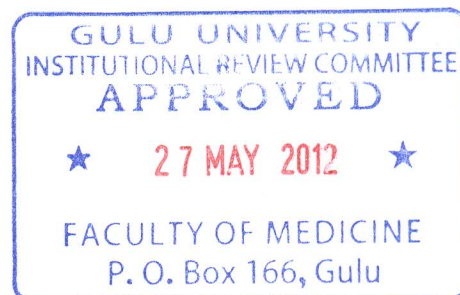

Supplement: MOESM1 [file 10026668]
